# Supplementary material for: Crosslinked acetylacetonated poly(vinyl alcohol-co-vinyl acetate) nanocomposites with graphene oxide and reduced graphene oxide: a new way to modify the property of nanocomposites
Source: Royal Society of Chemistry journal article supplement (doi:10.1039/c3ra40548f), 2013-01-01
Supplement: c3ra40548f.pdf [file c3ra40548f.pdf]

## Supporting information for

# **Crosslinked acetylated poly(vinyl alcohol-*co*-vinyl acetate) nanocomposites with graphene oxide and reduced graphene oxide: a new way to modify the property of nanocomposites**

**Bo Zhang, Shengjie Xu, Hui Tang\* and Peiyi Wu\***

The State Key Laboratory of Molecular Engineering of Polymers, Department of Macromolecular Science, and Laboratory of Advanced Materials, Fudan University, Shanghai 200433, China.

**Preparation of GO Sheets.** GO sheets were synthesized by a modified Hummers method. Expandable graphite powders (5 g), potassium permanganate (15 g) and concentrated  $\text{H}_2\text{SO}_4$  (115 mL) were mixed together. After keeping in the ice bath for 2 h, the reaction mixture was heated to 35 °C and stirred continuously for 0.5 h. 115 mL distilled water was slowly added to the reaction vessel, stirred for another 15 min and further diluted with 700 mL warm distilled water (40 °C) before adding 50 mL 30%  $\text{H}_2\text{O}_2$ . The resulted suspension was filtered, washed with 5% HCl and dialyzed for 7 days in the dark. Subsequently, the wet form of GO was freeze-dried before use.

**Characterization of GO Sheets.**

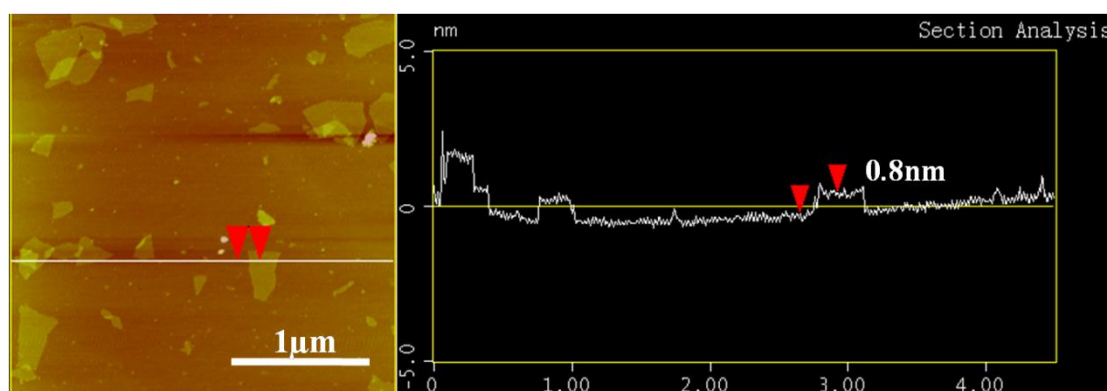

Fig. S1 AFM image of GO

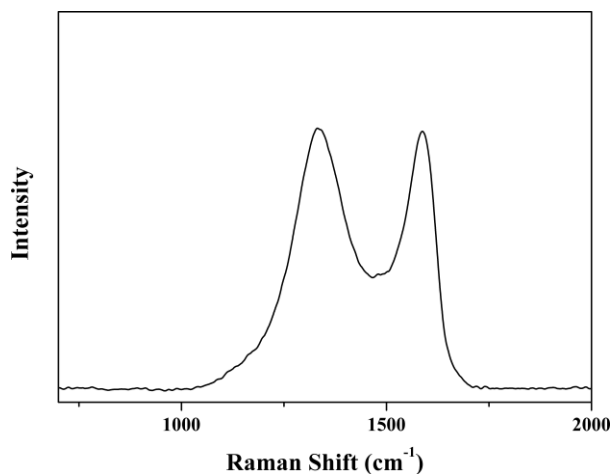

Fig. S2 Raman spectrum of GO

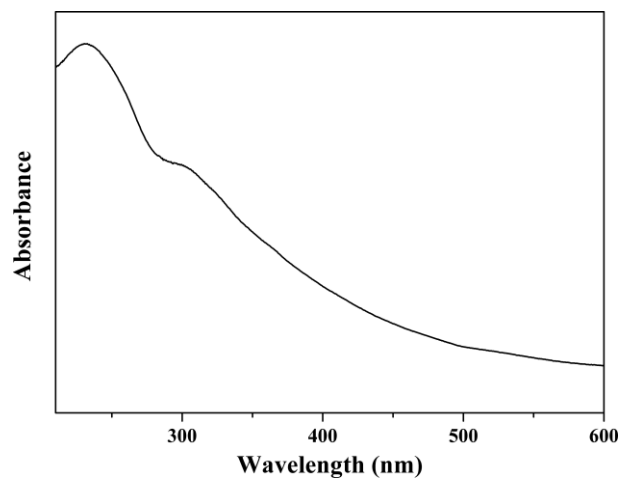

Fig. S3 UV-vis absorption spectrum of GO
